# Supplementary material for: Reactions of [Cu(X)(BPEP-Ph)] (X = PF6, SbF6) with silyl compounds. Cooperative bond activation involving non-coordinating anions
Source: Royal Society of Chemistry journal article supplement (doi:10.1039/c5dt03166d), 2015-09-25
Supplement: c5dt03166d1.pdf [file c5dt03166d1.pdf]

Electronic Supplementary Information for

**Reactions of [Cu(X)(BPEP-Ph)] (X = SbF<sub>6</sub>, PF<sub>6</sub>) with silyl compounds.  
Cooperative bond activation involving non-coordinating anions**

Y. Nakajima,<sup>\*,a</sup> T. Tsuchimoto,<sup>b</sup> Y.-H. Chang,<sup>b</sup> K. Takeuchi<sup>b</sup> and F. Ozawa<sup>\*,b</sup>

<sup>a</sup> *Interdisciplinary Research Center for Catalytic Chemistry, National Institute of Advanced Industrial Science and Technology, Higasi, Tsukuba, Ibaraki 305-8565, Japan*

<sup>b</sup> *International Research Center for Elements Science (IRCELS), Institute for Chemical Research, Kyoto University, Uji, Kyoto 611-0011, Japan*

E-mail: yumiko-nakajima@aist.go.jp

*Contents*

|                                                                                           |    |
|-------------------------------------------------------------------------------------------|----|
| <b>Table S1.</b> Crystallographic data for <b>1c</b> , <b>2b</b> and <b>3b</b>            | S2 |
| <b>Fig. S1</b> ORTEP drawing of <b>1c</b> with 50% probability ellipsoids.                | S2 |
| <b>Fig. S2</b> ORTEP drawing of <b>3b</b> with 50% probability ellipsoids.                | S3 |
| <b>Fig. S3</b> Optimized structure of [Cu(CN–PF <sub>5</sub> )(BPEP-Ph')].                | S3 |
| <b>Fig. S4</b> Optimized structure of [Cu(CN–SbF <sub>5</sub> )(BPEP-Ph')].               | S4 |
| <b>Fig. S5</b> Optimized structure of [Cu(CNSiMe <sub>3</sub> )(BPEP-Ph')] <sup>+</sup> . | S4 |
| <b>Fig. S6</b> Optimized structure of PF <sub>6</sub> <sup>-</sup> .                      | S5 |
| <b>Fig. S7</b> Optimized structure of SbF <sub>6</sub> <sup>-</sup> .                     | S5 |
| <b>Fig. S8</b> Optimized structure of Me <sub>3</sub> SiF.                                | S5 |
| <b>Table S2.</b> Cartesian coordination of all species                                    | S6 |

**Table S1** Crystallographic data for **1c**, **2b** and **3b**.

| Compound                                                     | <b>1c</b>                                                          | <b>2b</b>                                                                         | <b>3b</b>                                                                                               |
|--------------------------------------------------------------|--------------------------------------------------------------------|-----------------------------------------------------------------------------------|---------------------------------------------------------------------------------------------------------|
| Empirical formula                                            | C <sub>87</sub> H <sub>83</sub> BCuF <sub>24</sub> NP <sub>2</sub> | C <sub>56</sub> H <sub>71</sub> CuF <sub>5</sub> N <sub>2</sub> P <sub>2</sub> Sb | C <sub>59</sub> H <sub>60</sub> CuF <sub>6</sub> N <sub>2</sub> P <sub>2</sub> SbSi · Et <sub>2</sub> O |
| Fw                                                           | 1734.83                                                            | 1114.38                                                                           | 11280.69                                                                                                |
| Crystal system                                               | Monoclinic                                                         | Monoclinic                                                                        | Monoclinic                                                                                              |
| space group                                                  | <i>P</i> 2 <sub>1</sub> / <i>a</i>                                 | <i>P</i> 2 <sub>1</sub> / <i>c</i>                                                | <i>P</i> 2 <sub>1</sub> / <i>c</i>                                                                      |
| <i>a</i> (Å)                                                 | 22.251(2)                                                          | 16.0869(4)                                                                        | 17.454(8)                                                                                               |
| <i>b</i> (Å)                                                 | 17.9388(13)                                                        | 18.6680(5)                                                                        | 21.139(8)                                                                                               |
| <i>c</i> (Å)                                                 | 23.884(3)                                                          | 18.6526(5)                                                                        | 19.014(8)                                                                                               |
| $\alpha$ (deg)                                               | 90.00                                                              | 90.00                                                                             | 90.00                                                                                                   |
| $\beta$ (deg)                                                | 116.157(4)                                                         | 95.9373(12)                                                                       | 98.995(11)                                                                                              |
| $\gamma$ (deg)                                               | 90.00                                                              | 90.00                                                                             | 90.00                                                                                                   |
| <i>V</i> (Å <sup>3</sup> )                                   | 8557.4(14)                                                         | 5571.5(3)                                                                         | 6929(5)                                                                                                 |
| <i>Z</i>                                                     | 4                                                                  | 4                                                                                 | 4                                                                                                       |
| $\mu$ (Mo <i>K</i> $\alpha$ ) (mm <sup>-1</sup> )            | 1.347                                                              | 0.977                                                                             | 1.228                                                                                                   |
| temp (K)                                                     | 173(2)                                                             | 173(2)                                                                            | 173(2)                                                                                                  |
| reflections collected                                        | 85475                                                              | 68671                                                                             | 54096                                                                                                   |
| unique reflections                                           | 19505 ( <i>R</i> <sub>int</sub> = 0.0997)                          | 6951 ( <i>R</i> <sub>int</sub> = 0.0946)                                          | 15699 ( <i>R</i> <sub>int</sub> = 0.1632)                                                               |
| GOF                                                          | 1.259                                                              | 1.178                                                                             | 1.301                                                                                                   |
| final <i>R</i> indices ( <i>I</i> > 2 $\sigma$ ( <i>I</i> )) | <i>R</i> 1 = 0.0985, <i>wR</i> 2 = 0.2337                          | <i>R</i> 1 = 0.0717, <i>wR</i> 2 = 0.1763                                         | <i>R</i> 1 = 0.1713, <i>wR</i> 2 = 0.3056                                                               |
| <i>R</i> indices (all data)                                  | <i>R</i> 1 = 0.1419, <i>wR</i> 2 = 0.2592                          | <i>R</i> 1 = 0.0778, <i>wR</i> 2 = 0.1808                                         | <i>R</i> 1 = 0.2854, <i>wR</i> 2 = 0.3644                                                               |

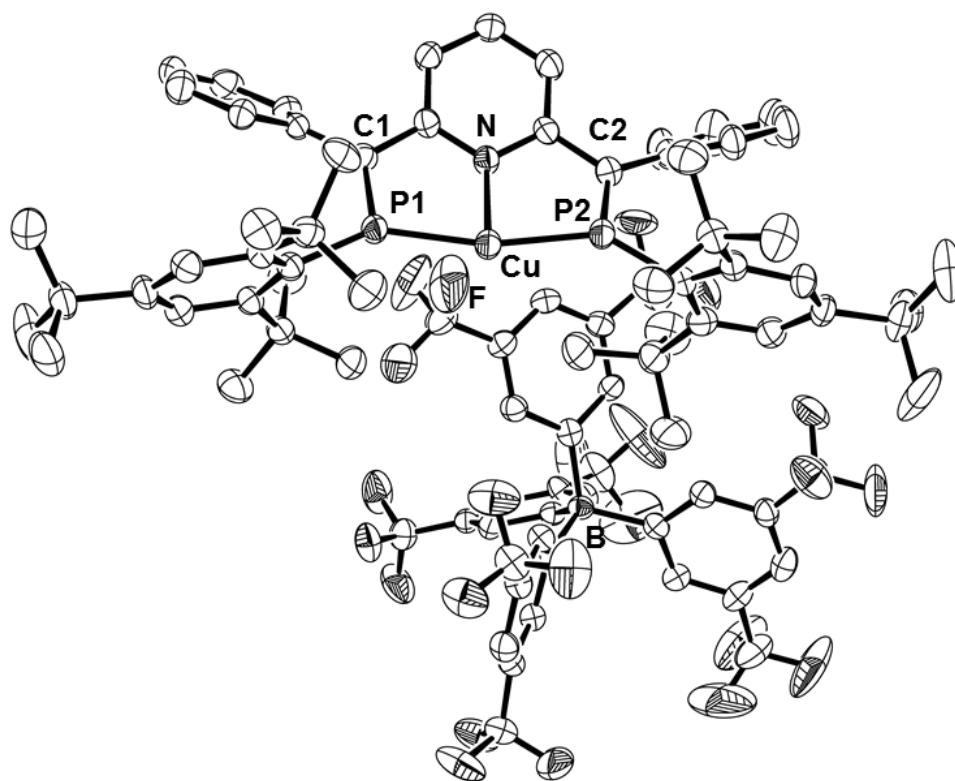**Fig. S1** ORTEP drawing of **1c** with 50% probability ellipsoids. Hydrogen atoms were omitted for clarity.

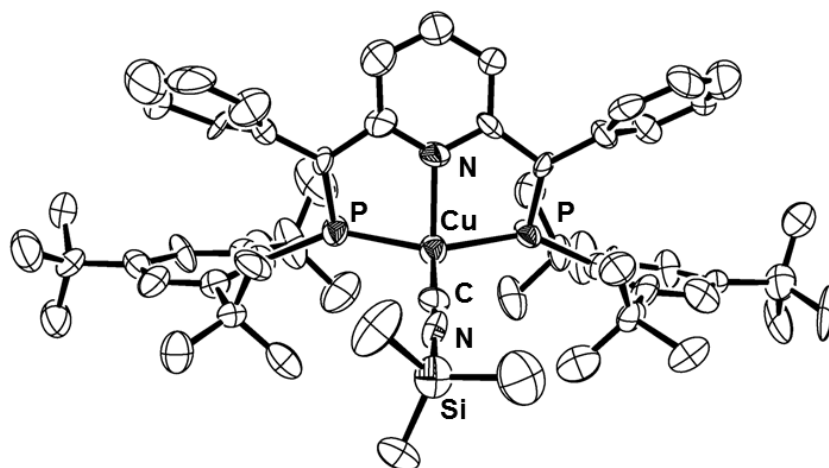

**Fig. S2** ORTEP drawing of **3b** with 50% probability ellipsoids. Hydrogen atoms, the  $\text{SbF}_6^-$  anion and the  $\text{Et}_2\text{O}$  molecule were omitted for clarity.

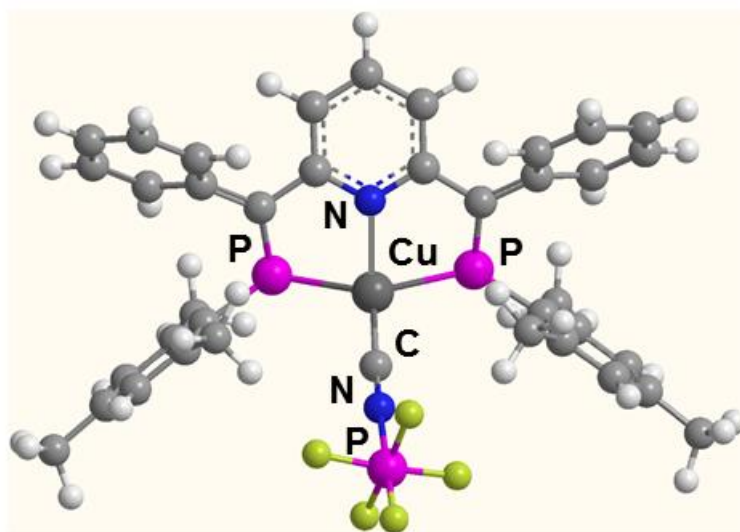

(Energy  $-3298.77867882$  a.u.)

**Fig. S3** Optimized structure of  $[\text{Cu}(\text{CN}-\text{PF}_5)(\text{BPEP}-\text{Ph}^{\prime})]$ . Selected bond distances ( $\text{\AA}$ ) and angles (deg):  
 $\text{Cu}-\text{P} = 2.34, 2.35$ ,  $\text{Cu}-\text{N} = 2.06$ ,  $\text{Cu}-\text{C} = 1.90$ ,  $\text{C}-\text{N} = 1.16$ ,  $\text{N}-\text{P} = 1.87$ ,  $\text{N}-\text{Cu}-\text{C} = 138.9$ ,  $\text{Cu}-\text{C}-\text{N} = 173.8$ ,  
 $\text{C}-\text{N}-\text{P} = 172.6$ .

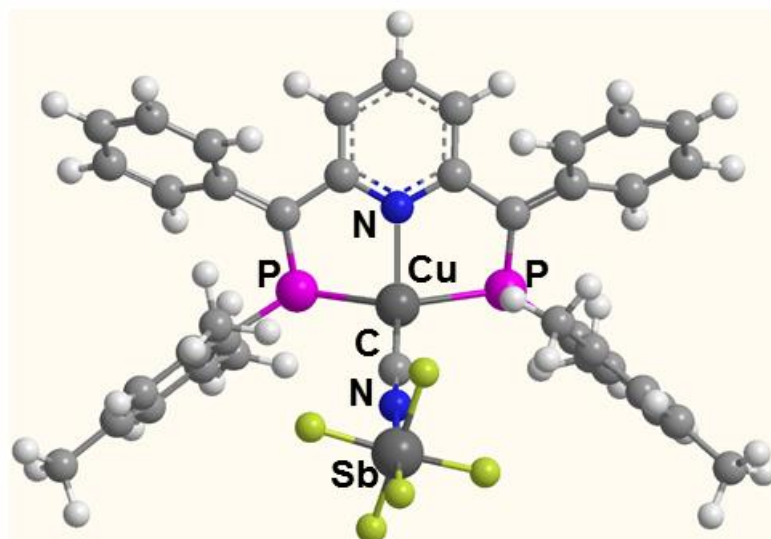

(Energy  $-2962.86124162$  a.u.)

**Fig. S4** Optimized structure of  $[\text{Cu}(\text{CN-SbF}_5)(\text{BPEP-Ph}')]$ . Selected bond distances ( $\text{\AA}$ ) and angles (deg):  $\text{Cu-P} = 2.32$  ( $\times 2$ ),  $\text{Cu-N} = 2.04$ ,  $\text{Cu-C} = 1.89$ ,  $\text{C-N} = 1.16$ ,  $\text{N-Sb} = 2.13$ ,  $\text{N-Cu-C} = 136.4$ ,  $\text{Cu-C-N} = 175.0$ ,  $\text{C-N-Sb} = 166.6$ .

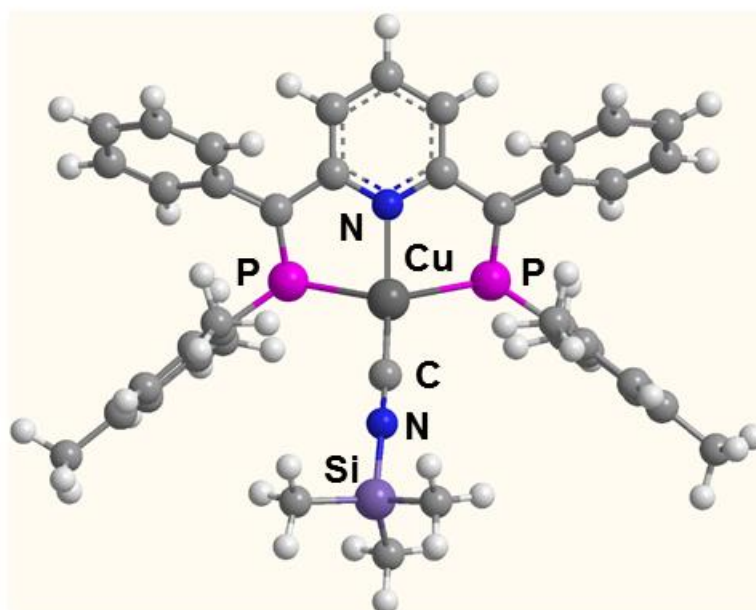

(Energy  $-2867.20958577$  a.u.)

**Fig. S5** Optimized structure of a cationic part of  $[\text{Cu}(\text{CNSiMe}_3)(\text{BPEP-Ph}')]$ <sup>+</sup>. Selected bond distances ( $\text{\AA}$ ) and angles (deg):  $\text{Cu-P} = 2.36$  ( $\times 2$ ),  $\text{Cu-N} = 2.07$ ,  $\text{Cu-C} = 1.90$ ,  $\text{C-N} = 1.17$ ,  $\text{N-Si} = 1.81$ ,  $\text{N-Cu-C} = 145.0$ ,  $\text{Cu-C-N} = 174.8$ ,  $\text{C-N-P} = 178.4$ .

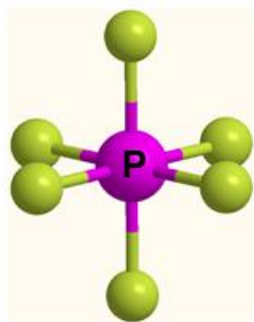

(Energy -940.673693678 a.u.)

**Fig. S6** Optimized structure of  $\text{PF}_6^-$ . Selected bond distance ( $\text{\AA}$ ) and angle (deg): P-F = 1.64 (av.), F-P-F = 90.0 (av.).

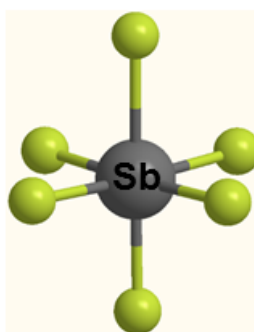

(Energy -604.749000582 a.u.)

**Fig. S7** Optimized structure of  $\text{SbF}_6^-$ . Selected bond distance ( $\text{\AA}$ ) and angle (deg): Sb-F = 1.88 (av.), F-Sb-F = 90.0 (av.).

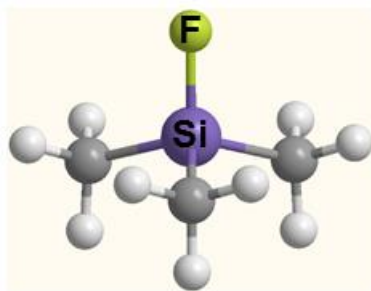

(Energy -509.111961763 a.u.)

**Fig. S8** Optimized structure of  $\text{Me}_3\text{SiF}$ . Selected bond distances ( $\text{\AA}$ ): Si-F = 1.63, Si-C = 1.88 ( $\times 3$ ).

**Table S2.** Cartesian coordination of all species

| Compound [Cu(CN–PF <sub>5</sub> )(BPEP-Ph <sup>'</sup> )] |           |           |           | Compound [Cu(CN–SbF <sub>5</sub> )(BPEP-Ph <sup>'</sup> )] |           |           |           |
|-----------------------------------------------------------|-----------|-----------|-----------|------------------------------------------------------------|-----------|-----------|-----------|
| Atomic Coordinates (Angstroms)                            |           |           |           | Atomic Coordinates (Angstroms)                             |           |           |           |
| Number                                                    | X         | Y         | Z         | Number                                                     | X         | Y         | Z         |
| 29                                                        | -0.102813 | 0.831933  | -0.851408 | 29                                                         | -0.097310 | 0.832589  | -0.804263 |
| 15                                                        | 2.030191  | 1.231844  | -1.742526 | 15                                                         | 1.989802  | 1.244837  | -1.736998 |
| 15                                                        | -2.351266 | 1.433988  | -1.099141 | 15                                                         | -2.320636 | 1.424775  | -1.060995 |
| 7                                                         | 0.070539  | 2.808330  | -0.293519 | 7                                                          | 0.073090  | 2.786326  | -0.237829 |
| 6                                                         | -0.029904 | -0.893274 | -0.054285 | 6                                                          | 0.042306  | -0.850846 | 0.036763  |
| 7                                                         | 0.071893  | -1.890770 | 0.529579  | 7                                                          | 0.174524  | -1.836578 | 0.629708  |
| 15                                                        | 0.326583  | -3.366486 | 1.651721  | 51                                                         | 0.566303  | -3.348440 | 2.085289  |
| 9                                                         | 1.742787  | -3.588173 | 0.884580  | 9                                                          | 2.209048  | -3.650939 | 1.166566  |
| 9                                                         | -0.424010 | -4.254891 | 0.530678  | 9                                                          | -0.313500 | -4.568458 | 0.928210  |
| 9                                                         | 1.060564  | -2.327667 | 2.663664  | 9                                                          | 1.414050  | -1.954873 | 3.075312  |
| 9                                                         | 0.553044  | -4.612436 | 2.629946  | 9                                                          | 0.923275  | -4.655903 | 3.402451  |
| 9                                                         | -1.109044 | -2.985282 | 2.314031  | 9                                                          | -1.107148 | -2.855910 | 2.850929  |
| 6                                                         | 4.997112  | -1.029111 | -3.429858 | 6                                                          | 4.797301  | -1.093905 | -3.523442 |
| 6                                                         | 5.567783  | -1.738237 | -2.361662 | 6                                                          | 5.441222  | -1.757056 | -2.472891 |
| 6                                                         | 3.955467  | -0.117210 | -3.234193 | 6                                                          | 3.780624  | -0.169194 | -3.294076 |
| 6                                                         | 5.071521  | -1.506842 | -1.075421 | 6                                                          | 5.044960  | -1.463930 | -1.168872 |
| 6                                                         | 3.471800  | 0.117499  | -1.914328 | 6                                                          | 3.407966  | 0.132937  | -1.957112 |
| 6                                                         | 4.029409  | -0.599596 | -0.821113 | 6                                                          | 4.041132  | -0.532815 | -0.878891 |
| 6                                                         | -5.870320 | -0.531694 | -1.828709 | 6                                                          | -5.788932 | -0.513897 | -1.962546 |
| 6                                                         | -4.735120 | 0.275906  | -1.957878 | 6                                                          | -4.645197 | 0.281832  | -2.041469 |
| 6                                                         | 4.879205  | 3.045709  | -1.295239 | 6                                                          | 4.839987  | 3.026068  | -1.313373 |
| 6                                                         | 6.159026  | 3.424703  | -0.885296 | 6                                                          | 6.124027  | 3.400143  | -0.927787 |
| 6                                                         | -6.181299 | -1.180114 | -0.624814 | 6                                                          | -6.169523 | -1.140864 | -0.773148 |
| 6                                                         | -3.880731 | 0.463474  | -0.834369 | 6                                                          | -3.863069 | 0.481441  | -0.876793 |
| 6                                                         | 2.443217  | 2.611123  | -0.797383 | 6                                                          | 2.425402  | 2.590006  | -0.769075 |
| 6                                                         | 3.802558  | 3.032345  | -0.384053 | 6                                                          | 3.788174  | 3.000905  | -0.381537 |
| 6                                                         | 6.394523  | 3.794140  | 0.444713  | 6                                                          | 6.386516  | 3.752518  | 0.397063  |
| 6                                                         | -5.323473 | -0.996639 | 0.465151  | 6                                                          | -5.372154 | -0.949669 | 0.357462  |
| 6                                                         | -4.171805 | -0.196946 | 0.391170  | 6                                                          | -4.222211 | -0.155767 | 0.337471  |
| 6                                                         | 1.288243  | 3.432231  | -0.403903 | 6                                                          | 1.281965  | 3.404451  | -0.346134 |
| 6                                                         | -2.355959 | 2.847225  | -0.114363 | 6                                                          | -2.341665 | 2.818574  | -0.066205 |
| 6                                                         | 1.402509  | 4.819666  | -0.189809 | 6                                                          | 1.401702  | 4.784656  | -0.116214 |
| 6                                                         | -4.784833 | 3.510477  | 0.068741  | 6                                                          | -4.762048 | 3.487369  | 0.066350  |
| 6                                                         | -1.063915 | 3.549398  | -0.073675 | 6                                                          | -1.052337 | 3.517985  | -0.006757 |
| 6                                                         | 4.054477  | 3.414069  | 0.953498  | 6                                                          | 4.066556  | 3.362411  | 0.950977  |
| 6                                                         | 5.337590  | 3.786078  | 1.362506  | 6                                                          | 5.353548  | 3.730921  | 1.335049  |
| 6                                                         | 0.261995  | 5.570983  | 0.088325  | 6                                                          | 0.267199  | 5.530888  | 0.175282  |
| 6                                                         | -0.979478 | 4.939010  | 0.139356  | 6                                                          | -0.970816 | 4.900584  | 0.220323  |
| 6                                                         | -5.858651 | 4.017383  | 0.803404  | 6                                                          | -5.844995 | 3.995325  | 0.778714  |
| 6                                                         | -3.501820 | 3.401043  | 0.644718  | 6                                                          | -3.496104 | 3.373963  | 0.665745  |
| 6                                                         | -5.677967 | 4.422754  | 2.131475  | 6                                                          | -5.689190 | 4.396892  | 2.106060  |
| 6                                                         | -3.334003 | 3.819948  | 1.984590  | 6                                                          | -3.352547 | 3.787480  | 2.005336  |
| 6                                                         | -4.411654 | 4.320775  | 2.719363  | 6                                                          | -4.439087 | 4.289711  | 2.717051  |
| 1                                                         | 5.369222  | -1.193915 | -4.437635 | 1                                                          | 5.086642  | -1.311789 | -4.545424 |
| 1                                                         | -6.524283 | -0.660109 | -2.687172 | 1                                                          | -6.390616 | -0.655055 | -2.853415 |
| 1                                                         | 5.492975  | -2.055062 | -0.237093 | 1                                                          | 5.512691  | -1.986381 | -0.342215 |

|   |           |           |           |   |           |           |           |
|---|-----------|-----------|-----------|---|-----------|-----------|-----------|
| 1 | 4.705019  | 2.767956  | -2.328263 | 1 | 4.641657  | 2.760730  | -2.342788 |
| 1 | 6.971825  | 3.433576  | -1.604235 | 1 | 6.919338  | 3.417925  | -1.661735 |
| 1 | -4.933591 | 3.207404  | -0.961087 | 1 | -4.889561 | 3.186020  | -0.964116 |
| 1 | 7.390663  | 4.084746  | 0.762123  | 1 | 7.386384  | 4.039874  | 0.695652  |
| 1 | 2.374631  | 5.289021  | -0.262087 | 1 | 2.372525  | 5.250686  | -0.191656 |
| 1 | -5.544294 | -1.497965 | 1.403652  | 1 | -5.641168 | -1.442841 | 1.284356  |
| 1 | -6.835673 | 4.098539  | 0.338183  | 1 | -6.810217 | 4.078990  | 0.296201  |
| 1 | 0.336656  | 6.642187  | 0.240280  | 1 | 0.342441  | 6.597689  | 0.338458  |
| 1 | -1.883719 | 5.503310  | 0.324711  | 1 | -1.874324 | 5.460483  | 0.408532  |
| 1 | 3.244425  | 3.394174  | 1.675464  | 1 | 3.274530  | 3.325722  | 1.688254  |
| 1 | 5.512174  | 4.063230  | 2.397173  | 1 | 5.550638  | 3.993013  | 2.366673  |
| 1 | -6.514497 | 4.813623  | 2.701471  | 1 | -6.533225 | 4.788284  | 2.659023  |
| 1 | -2.359242 | 3.730332  | 2.453232  | 1 | -2.390293 | 3.689268  | 2.492002  |
| 1 | -4.263209 | 4.625420  | 3.750369  | 1 | -4.310785 | 4.590083  | 3.749069  |
| 6 | 6.663692  | -2.751406 | -2.601304 | 6 | 6.500284  | -2.791793 | -2.743347 |
| 1 | 6.241266  | -3.743705 | -2.809738 | 1 | 6.068814  | -3.797536 | -2.739449 |
| 1 | 7.286324  | -2.475426 | -3.459169 | 1 | 6.970407  | -2.639503 | -3.716177 |
| 1 | 7.313110  | -2.852733 | -1.725764 | 1 | 7.281443  | -2.771687 | -1.981438 |
| 6 | 3.538560  | -0.489165 | 0.607211  | 6 | 3.687103  | -0.319481 | 0.568949  |
| 1 | 2.914290  | 0.388549  | 0.777399  | 1 | 4.479468  | 0.232371  | 1.082002  |
| 1 | 2.951825  | -1.373143 | 0.882999  | 1 | 2.762382  | 0.237033  | 0.703611  |
| 1 | 4.386825  | -0.434869 | 1.298627  | 1 | 3.563321  | -1.276726 | 1.076044  |
| 6 | -3.281056 | -0.134161 | 1.614425  | 6 | -3.408840 | -0.022846 | 1.597012  |
| 1 | -2.567707 | -0.968021 | 1.624442  | 1 | -2.347980 | -0.208979 | 1.423869  |
| 1 | -2.708649 | 0.792653  | 1.676691  | 1 | -3.504517 | 0.976045  | 2.029524  |
| 1 | -3.881839 | -0.218326 | 2.525744  | 1 | -3.736688 | -0.743855 | 2.344786  |
| 6 | -7.391403 | -2.079740 | -0.517894 | 6 | -7.381161 | -2.032466 | -0.719645 |
| 1 | -8.179847 | -1.776902 | -1.214906 | 1 | -8.094475 | -1.786249 | -1.507634 |
| 1 | -7.128644 | -3.120129 | -0.752592 | 1 | -7.097271 | -3.081530 | -0.848717 |
| 1 | -7.808514 | -2.071619 | 0.494561  | 1 | -7.894428 | -1.951444 | 0.240214  |
| 6 | -4.460532 | 0.940096  | -3.294093 | 6 | -4.281298 | 0.919673  | -3.360825 |
| 1 | -4.499462 | 2.035356  | -3.230016 | 1 | -4.340329 | 2.011497  | -3.321832 |
| 1 | -3.469509 | 0.678132  | -3.685683 | 1 | -3.263024 | 0.664662  | -3.668664 |
| 1 | -5.201398 | 0.628228  | -4.036257 | 1 | -4.955643 | 0.583431  | -4.148964 |
| 6 | 3.382830  | 0.606700  | -4.438343 | 6 | 3.111272  | 0.495711  | -4.473356 |
| 1 | 2.303139  | 0.439750  | -4.541577 | 1 | 2.028922  | 0.336351  | -4.469037 |
| 1 | 3.534192  | 1.692623  | -4.381880 | 1 | 3.276315  | 1.577072  | -4.487446 |
| 1 | 3.859994  | 0.256013  | -5.358343 | 1 | 3.497583  | 0.092903  | -5.410177 |

| Compound [Cu(CNSiMe <sub>3</sub> )(BPEP-Ph <sup>+</sup> )] <sup>+</sup> |           |           |           | Compound SbF <sub>6</sub> <sup>-</sup> |           |           |          |
|-------------------------------------------------------------------------|-----------|-----------|-----------|----------------------------------------|-----------|-----------|----------|
| Atomic Coordinates (Angstroms)                                          |           |           |           | Atomic Coordinates (Angstroms)         |           |           |          |
| Number                                                                  | X         | Y         | Z         | Number                                 | X         | Y         | Z        |
| 29                                                                      | -0.017606 | 0.905111  | -0.586994 | 51                                     | 0.369370  | -2.983481 | 3.639041 |
| 15                                                                      | 2.104735  | 1.298965  | -1.534877 | 9                                      | 1.620934  | -4.083465 | 2.738209 |
| 15                                                                      | -2.275738 | 1.457834  | -1.004315 | 9                                      | -1.041231 | -4.091414 | 3.029971 |
| 7                                                                       | 0.097472  | 2.938492  | -0.214835 | 9                                      | 1.780131  | -1.875513 | 4.247818 |
| 6                                                                       | -0.028348 | -0.827700 | 0.202908  | 9                                      | 0.543449  | -4.056865 | 5.190191 |
| 7                                                                       | -0.077678 | -1.928260 | 0.598618  | 9                                      | -0.882537 | -1.884417 | 4.540654 |
| 6                                                                       | 5.034732  | -1.102270 | -3.085405 | 9                                      | 0.195883  | -1.909844 | 2.088116 |

|   |           |           |           |                                            |           |           |           |
|---|-----------|-----------|-----------|--------------------------------------------|-----------|-----------|-----------|
| 6 | 5.714179  | -1.615575 | -1.970362 | <b>Compound PF<sub>6</sub><sup>-</sup></b> |           |           |           |
| 6 | 3.968843  | -0.205307 | -2.952942 | Atomic Coordinates (Angstroms)             |           |           |           |
| 6 | 5.295224  | -1.209413 | -0.697168 | Number X Y Z                               |           |           |           |
| 6 | 3.571678  | 0.215440  | -1.650972 | 15                                         | 0.369435  | -2.983523 | 3.639149  |
| 6 | 4.237752  | -0.306621 | -0.508061 | 9                                          | 1.451814  | -3.933228 | 2.859450  |
| 6 | -5.594490 | -0.817443 | -1.749423 | 9                                          | -0.850453 | -3.940438 | 3.111909  |
| 6 | -4.493531 | 0.034870  | -1.894508 | 9                                          | 1.589276  | -2.026648 | 4.166262  |
| 6 | 4.874783  | 3.244776  | -1.353427 | 9                                          | 0.519307  | -3.912661 | 4.979313  |
| 6 | 6.141277  | 3.742255  | -1.040280 | 9                                          | -0.713025 | -2.033902 | 4.418793  |
| 6 | -6.010125 | -1.283881 | -0.493844 | 9                                          | 0.219645  | -2.054601 | 2.299123  |
| 6 | -3.779463 | 0.453712  | -0.734928 | <b>Compound Me<sub>3</sub>SiF</b>          |           |           |           |
| 6 | 2.478376  | 2.771024  | -0.724129 | Atomic Coordinates (Angstroms)             |           |           |           |
| 6 | 3.823175  | 3.305646  | -0.414334 | Number X Y Z                               |           |           |           |
| 6 | 6.388518  | 4.305201  | 0.218064  | 9                                          | -0.002998 | -1.961202 | 0.891449  |
| 6 | -5.279102 | -0.885919 | 0.633403  | 14                                         | -0.014210 | -3.476163 | 1.497884  |
| 6 | -4.173730 | -0.026100 | 0.545569  | 6                                          | -1.794641 | -3.908908 | 1.902438  |
| 6 | 1.293439  | 3.585641  | -0.400242 | 1                                          | -2.213432 | -3.215817 | 2.642142  |
| 6 | -2.340962 | 2.938184  | -0.125812 | 1                                          | -2.426278 | -3.864841 | 1.006899  |
| 6 | 1.363170  | 4.991889  | -0.358196 | 1                                          | -1.868739 | -4.923637 | 2.314807  |
| 6 | -4.787451 | 3.548689  | -0.131285 | 6                                          | 1.057531  | -3.475139 | 3.037972  |
| 6 | -1.060495 | 3.667741  | -0.109402 | 1                                          | 0.671131  | -2.776509 | 3.789964  |
| 6 | 4.085696  | 3.885767  | 0.849506  | 1                                          | 1.091745  | -4.473036 | 3.494271  |
| 6 | 5.356714  | 4.373830  | 1.162224  | 1                                          | 2.087286  | -3.179050 | 2.803562  |
| 6 | 0.199589  | 5.736588  | -0.176170 | 6                                          | 0.682854  | -4.616090 | 0.180564  |
| 6 | -1.021574 | 5.075304  | -0.064674 | 1                                          | 0.078990  | -4.580360 | -0.734342 |
| 6 | -5.902404 | 4.119925  | 0.484837  | 1                                          | 1.709395  | -4.335249 | -0.084467 |
| 6 | -3.528288 | 3.553880  | 0.506408  | 1                                          | 0.699873  | -5.656635 | 0.530103  |
| 6 | -5.787931 | 4.703791  | 1.752842  |                                            |           |           |           |
| 6 | -3.426653 | 4.154898  | 1.783787  |                                            |           |           |           |
| 6 | -4.546479 | 4.718123  | 2.400385  |                                            |           |           |           |
| 1 | 5.342182  | -1.407091 | -4.081935 |                                            |           |           |           |
| 1 | -6.139698 | -1.124933 | -2.637379 |                                            |           |           |           |
| 1 | 5.805521  | -1.603428 | 0.177383  |                                            |           |           |           |
| 1 | 4.690273  | 2.824463  | -2.335157 |                                            |           |           |           |
| 1 | 6.933218  | 3.697158  | -1.780223 |                                            |           |           |           |
| 1 | -4.883295 | 3.111636  | -1.118298 |                                            |           |           |           |
| 1 | 7.373622  | 4.690318  | 0.458621  |                                            |           |           |           |
| 1 | 2.318515  | 5.480417  | -0.494154 |                                            |           |           |           |
| 1 | -5.577782 | -1.250705 | 1.612462  |                                            |           |           |           |
| 1 | -6.858743 | 4.116457  | -0.027141 |                                            |           |           |           |
| 1 | 0.240056  | 6.819717  | -0.155729 |                                            |           |           |           |
| 1 | -1.945818 | 5.628989  | 0.030066  |                                            |           |           |           |
| 1 | 3.293938  | 3.934923  | 1.590364  |                                            |           |           |           |
| 1 | 5.541143  | 4.806478  | 2.139920  |                                            |           |           |           |
| 1 | -6.655989 | 5.146807  | 2.229101  |                                            |           |           |           |
| 1 | -2.470824 | 4.160342  | 2.297935  |                                            |           |           |           |
| 1 | -4.450471 | 5.166338  | 3.383735  |                                            |           |           |           |
| 6 | 6.848841  | -2.598570 | -2.142794 |                                            |           |           |           |
| 1 | 6.472614  | -3.593450 | -2.415767 |                                            |           |           |           |
| 1 | 7.531877  | -2.284190 | -2.939685 |                                            |           |           |           |
| 1 | 7.429652  | -2.706429 | -1.222075 |                                            |           |           |           |
| 6 | 3.856151  | 0.066727  | 0.908523  |                                            |           |           |           |
| 1 | 2.772893  | 0.030687  | 1.069009  |                                            |           |           |           |



---

|    |           |           |           |
|----|-----------|-----------|-----------|
| 1  | 4.324164  | -0.617194 | 1.622562  |
| 1  | 4.187179  | 1.081035  | 1.159804  |
| 6  | -3.452260 | 0.344459  | 1.823774  |
| 1  | -3.747791 | -0.325986 | 2.636119  |
| 1  | -2.363414 | 0.287278  | 1.719054  |
| 1  | -3.693427 | 1.366455  | 2.137687  |
| 6  | -7.220711 | -2.178327 | -0.361652 |
| 1  | -8.144045 | -1.584963 | -0.321118 |
| 1  | -7.312005 | -2.859298 | -1.214252 |
| 1  | -7.179819 | -2.778705 | 0.552479  |
| 6  | -4.105383 | 0.496388  | -3.286270 |
| 1  | -4.206794 | 1.582706  | -3.403563 |
| 1  | -3.065553 | 0.243953  | -3.529936 |
| 1  | -4.743628 | 0.025102  | -4.038874 |
| 6  | 3.282204  | 0.305931  | -4.205082 |
| 1  | 2.204581  | 0.098148  | -4.198147 |
| 1  | 3.398403  | 1.390359  | -4.326532 |
| 1  | 3.703038  | -0.169815 | -5.095281 |
| 14 | -0.202716 | -3.634771 | 1.194437  |
| 6  | -1.821739 | -3.691230 | 2.131597  |
| 1  | -1.805195 | -3.017778 | 2.996160  |
| 1  | -2.664451 | -3.404709 | 1.491943  |
| 1  | -2.011998 | -4.706089 | 2.503128  |
| 6  | 1.301305  | -3.875371 | 2.281168  |
| 1  | 1.302519  | -3.174129 | 3.123401  |
| 1  | 1.314009  | -4.891944 | 2.694203  |
| 1  | 2.229830  | -3.733180 | 1.716627  |
| 6  | -0.190694 | -4.688797 | -0.350271 |
| 1  | -1.038781 | -4.453687 | -1.003345 |
| 1  | 0.731694  | -4.548401 | -0.925213 |
| 1  | -0.259268 | -5.751168 | -0.083826 |

---
